# Supplementary material
Source: Springer Nature journal article supplement (https://www.springermedizin.de/resource/supplementary/12865_2013_546_MOESM1_ESM.pdf/9428182)

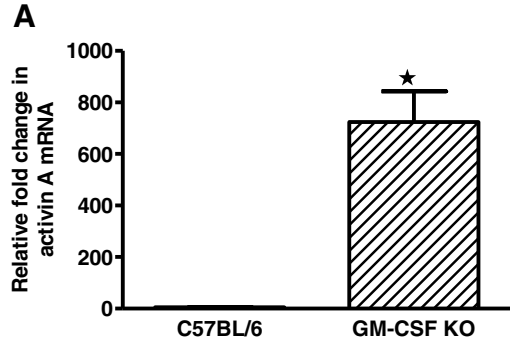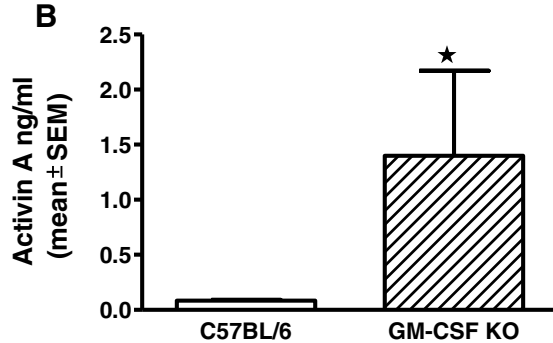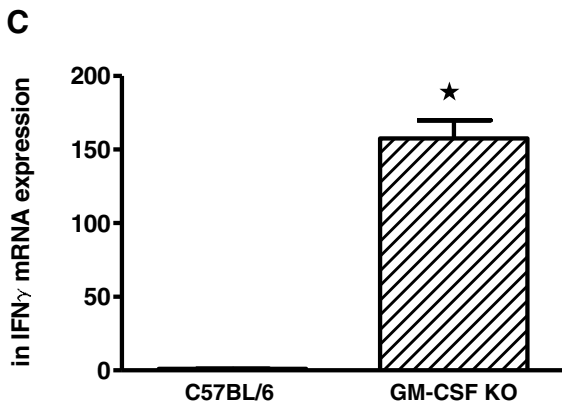

**D** C57BL/6 GM-CSF KO

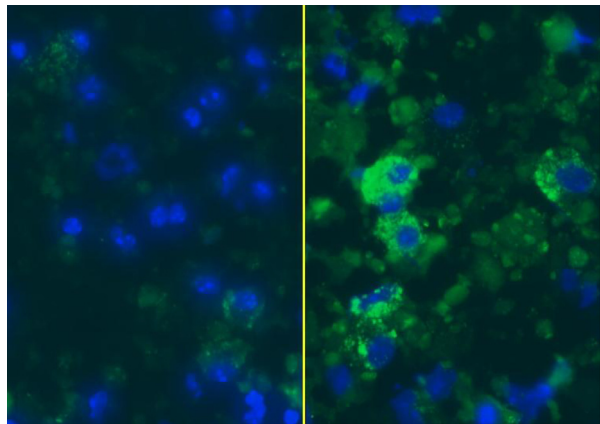

Supplement: MOESM1 [file 9428182]
